# Supplementary material for: Synthesis of V-notched half-open polymer microspheres via facile solvent-tuned self-assembly
Source: Royal Society of Chemistry journal article supplement (doi:10.1039/d1nj02279b), 2021-01-01
Supplement: d1nj02279b1.pdf [file d1nj02279b1.pdf]

## Electronic Supplementary Information (ESI)

### Synthesis of V-notched half-open polymer microspheres via a facile solvent-tuned self-assembly

Wei Xiong<sup>a,b,+</sup>, Xiaoyan Li<sup>a,+</sup>, Xue Ye<sup>a</sup>, Tao Huang<sup>a</sup>, Xingyu Feng<sup>a</sup>, Zhencheng Huang<sup>a</sup>, Shenghua Ye<sup>a,c</sup>, Xiangzhong Ren<sup>a</sup>, Qianling Zhang<sup>a,\*</sup>, Jianhong Liu<sup>a,c,\*</sup>

<sup>a</sup>College of Chemistry and Environmental Engineering, Graphene Composite Research Center, Shenzhen University, Shenzhen, 518060, P.R. China

<sup>b</sup>College of Physics and Optoelectronic Engineering, Shenzhen University, Shenzhen, 518060, P.R. China

<sup>c</sup>Shenzhen Eigen-Equation Graphene technology Co. Ltd, Shenzhen, 518060, P.R. China

+ Contribution equally to this work

Corresponding authors: liujh@szu.edu.cn (J. Liu); zhql@szu.edu.cn (Q. Zhang)

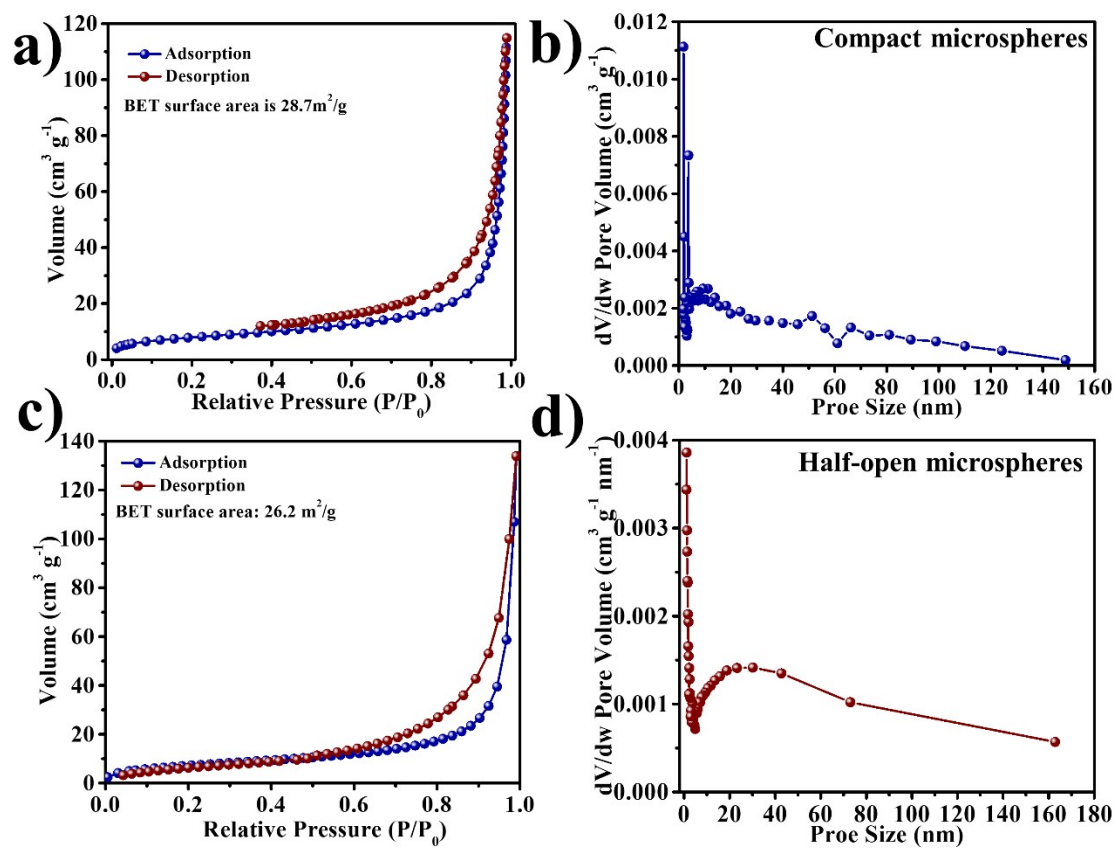

**Figure S1.** a,c) Nitrogen adsorption-desorption isotherm and b,d) cumulative pore volume of compact and half-open PTF microspheres, respectively.

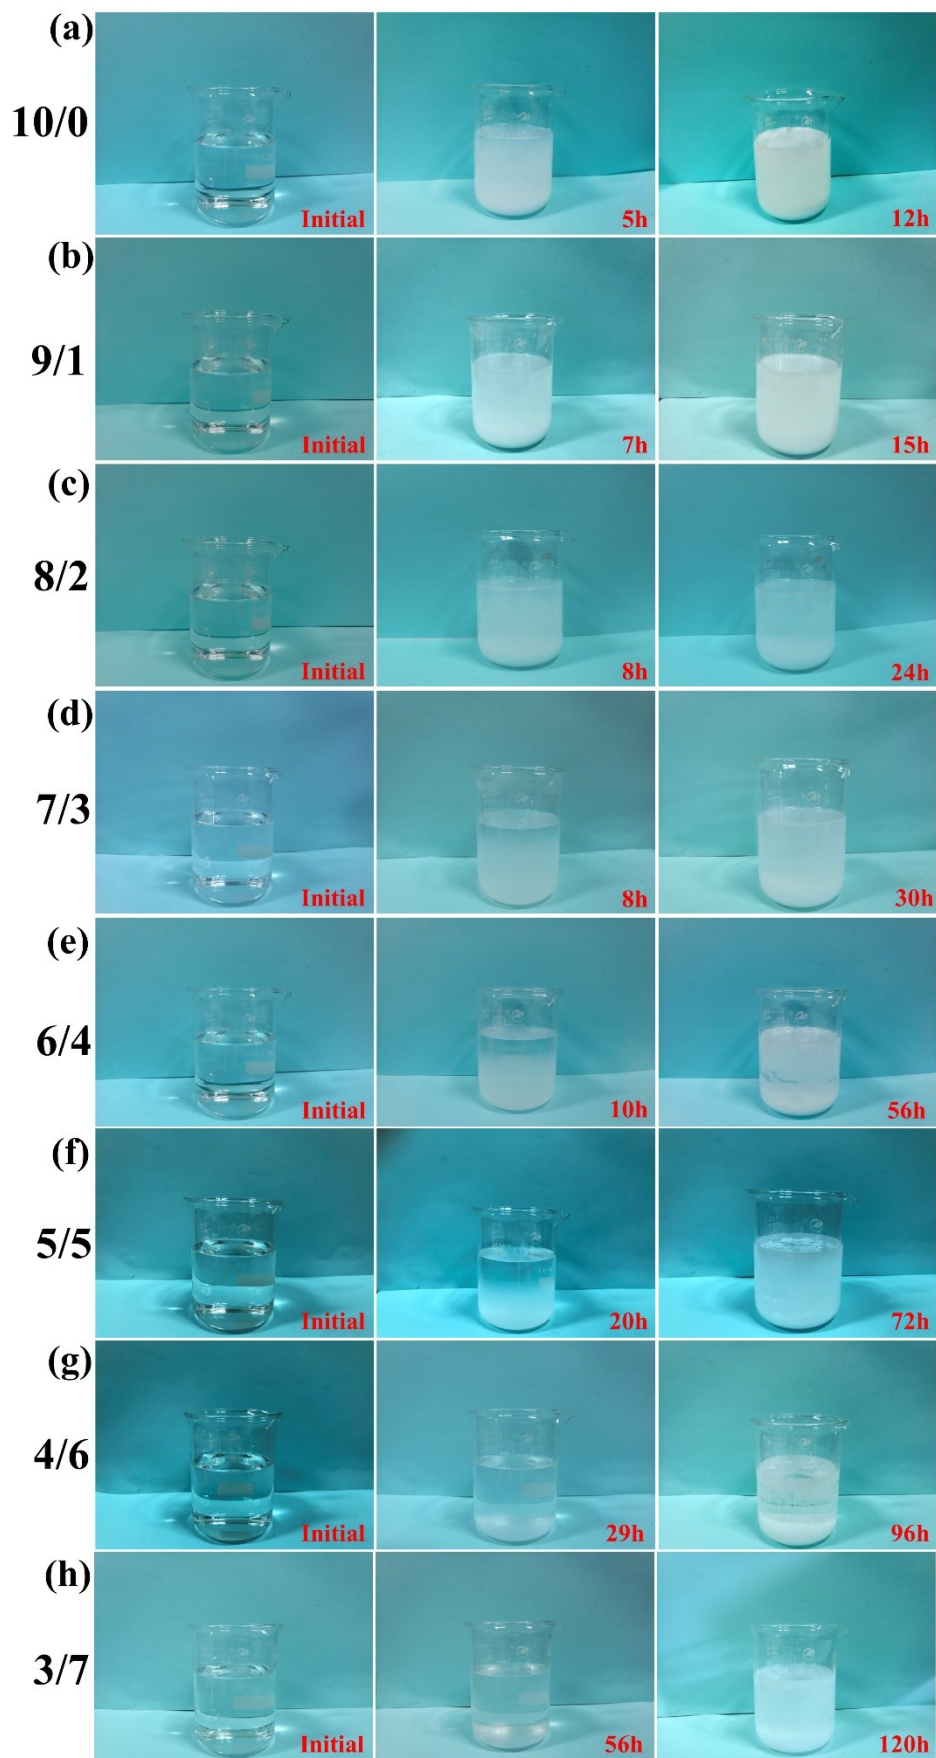

Figure S2. Digital images of the PTF resin obtained in mixed solvents of water and

ethanol at different volume ratios of a) 10/0, b) 9/1, c) 8/2, d) 7/3, e) 6/4, f) 5/5, g) 4/6, h) 3/7, respectively.

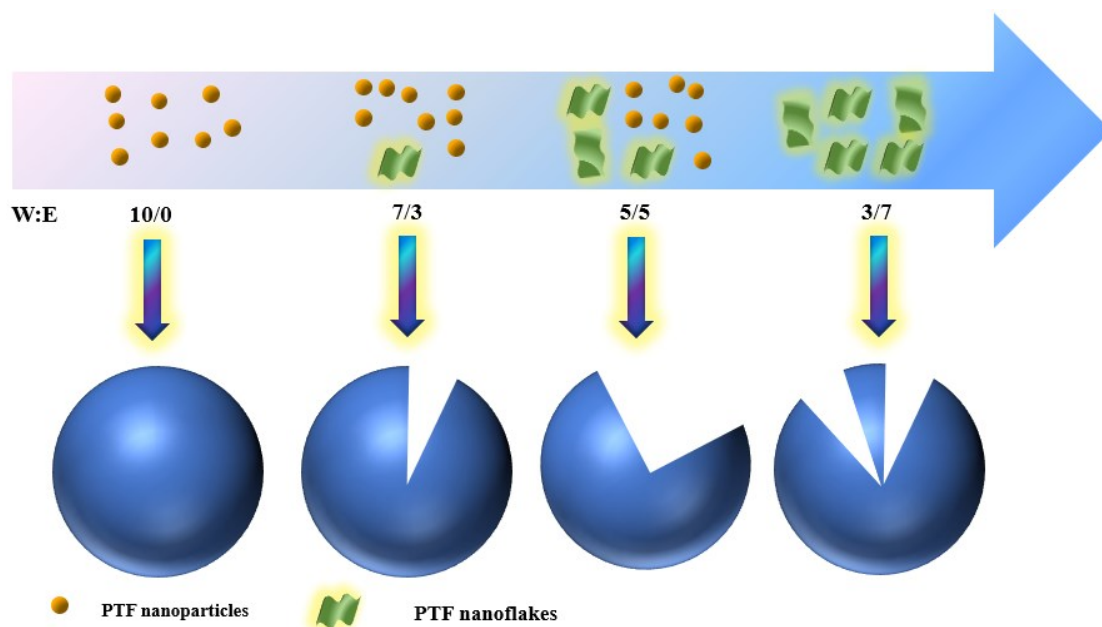

**Figure S3.** Schematic illustration of PTF microspheres prepared in mixed solvents at different ratios of water (W) and ethanol (E).

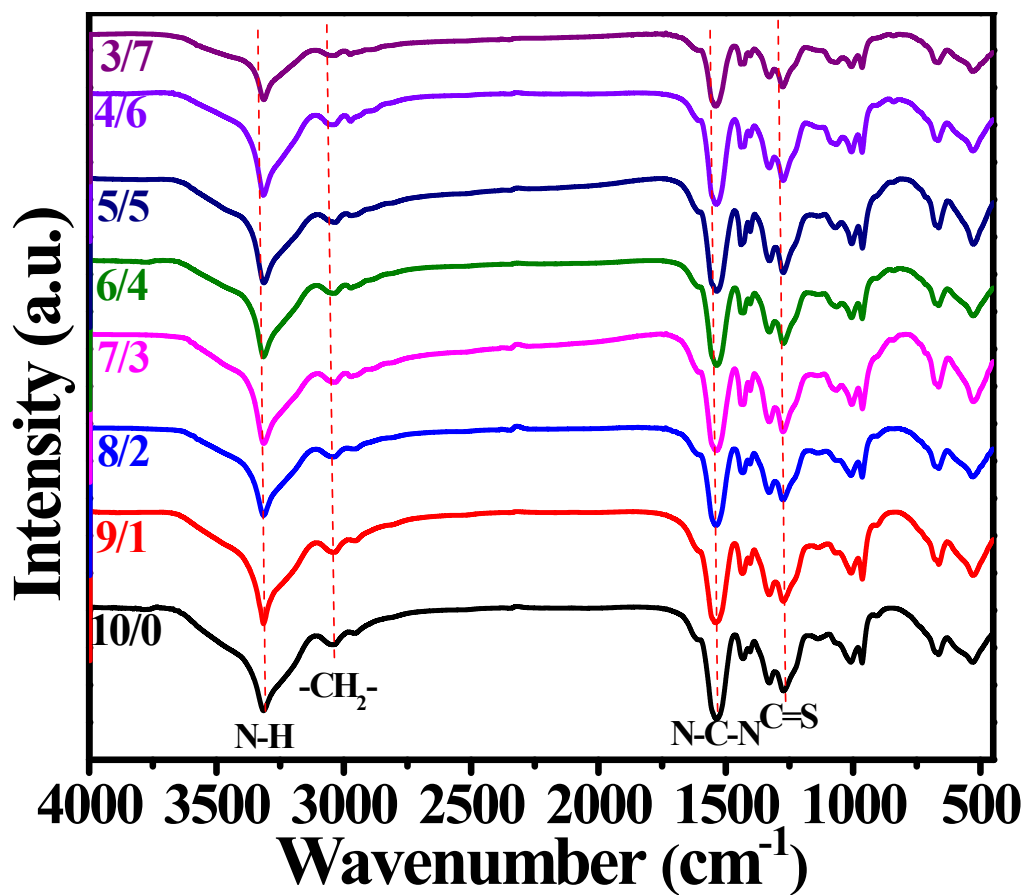

**Figure S4.** FTIR spectra of PTF resin obtained in mixed solvents of water and ethanol at different volume ratios of 10/0, 9/1, 8/2, 7/3, 6/4, 5/5, 4/6 and 3/7, respectively.

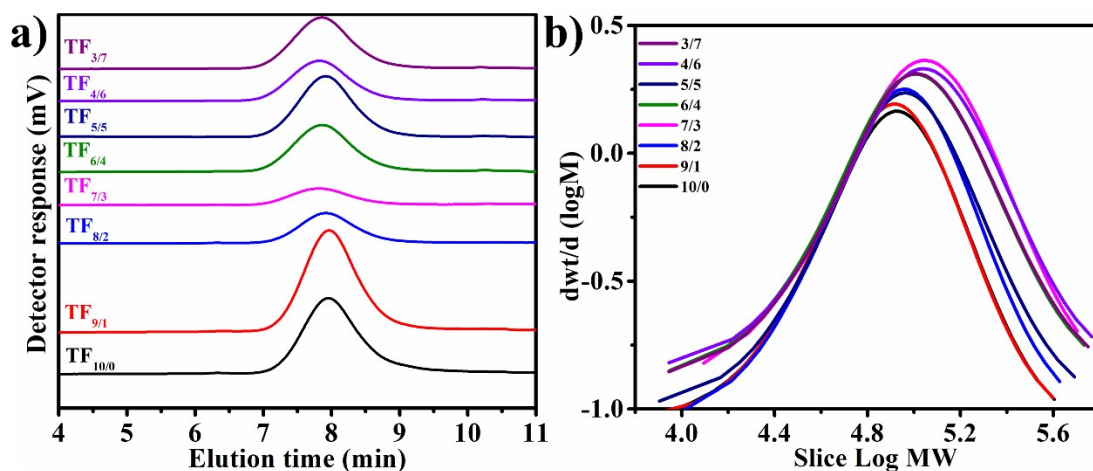

**Figure S5.** a) GPC chromatograms and b) molecular weight distribution of PTF resin

obtained in mixed solvents of water and ethanol at different volume ratios of 10/0, 9/1, 8/2, 7/3, 6/4, 5/5, 4/6 and 3/7, respectively.

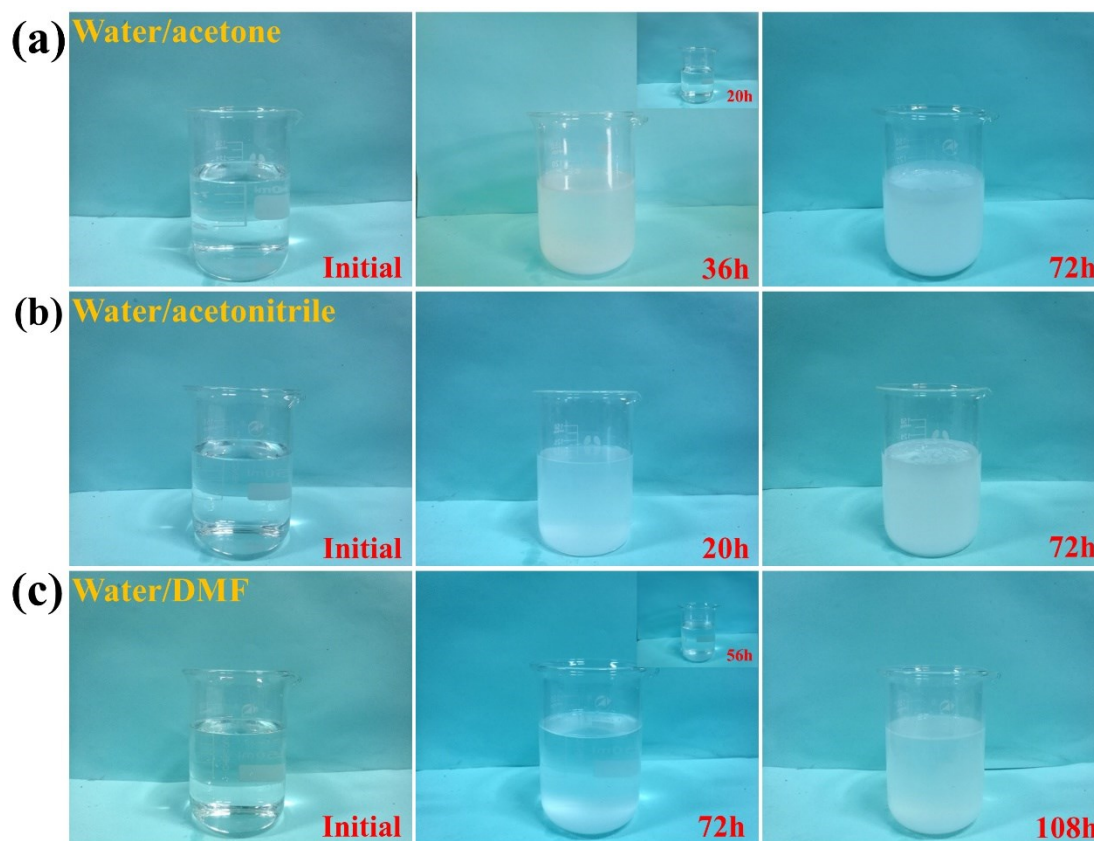

**Figure S6.** Digital images of the PTF resin obtained in mixed solvents of water and a) acetone, b) acetonitrile and c) DMF at the volume ratio of 5:5.

**Table. 1** GPC data summary of a series of thiourea formaldehyde resins.

| Sample             | M <sub>n</sub> | M <sub>w</sub> | M <sub>p</sub> | M <sub>z</sub> | M <sub>z+1</sub> | Polydispersity |
|--------------------|----------------|----------------|----------------|----------------|------------------|----------------|
| TF <sub>10/0</sub> | 55741          | 101333         | 84557          | 164421         | 240316           | 1.82           |
| TF <sub>9/1</sub>  | 56202          | 100253         | 82911          | 161846         | 237936           | 1.78           |
| TF <sub>8/2</sub>  | 66625          | 111647         | 90845          | 174811         | 247082           | 1.68           |
| TF <sub>7/3</sub>  | 79655          | 136573         | 111230         | 213745         | 295546           | 1.71           |
| TF <sub>6/4</sub>  | 71768          | 131247         | 101668         | 219459         | 324487           | 1.83           |
| TF <sub>5/5</sub>  | 66199          | 118343         | 91821          | 197411         | 296760           | 1.79           |
| TF <sub>4/6</sub>  | 76855          | 141803         | 110160         | 237584         | 350946           | 1.85           |
| TF <sub>3/7</sub>  | 73012          | 134222         | 102701         | 226701         | 338940           | 1.84           |

M<sub>n</sub> = number-average molecular weight [g mol<sup>-1</sup>, Daltons];

$M_w$  = weight-average molecular weight [ $\text{g mol}^{-1}$ ];

$M_p$  = peak molecular weight [ $\text{g mol}^{-1}$ ];

$M_z$  = z-average molecular weight [ $\text{g mol}^{-1}$ ];

$M_{z+1}$  = (z+1)-average molecular weight [ $\text{g mol}^{-1}$ ];

$\text{PDI} = M_w / M_n$  = polydispersity Index—relative spread in molecular weights.
